# Supplementary material for: Poly(sulfobetaine) versus poly(ethylene glycol) based copolymer modified polyurethane catheters for antifouling
Source: Royal Society of Chemistry journal article supplement (doi:10.1039/d4tb00156g), 2024-01-01
Supplement: d4tb00156g1.pdf [file d4tb00156g1.pdf]

## Supporting Information

### Poly(sulfobetaine) versus poly(ethylene glycol) based copolymers modified polyurethane catheters for antifouling

Haimei Cao, Tiankuan Zhu, Henan Wei and Shiping Zhang\*

Key Laboratory of Synthetic and Natural Functional Molecule Chemistry of Ministry of Education, College of Chemistry and Materials Science, Northwest University, Xi'an 710127, Shaanxi, PR China

E-mail: [zhangshp413@nwu.edu.cn](mailto:zhangshp413@nwu.edu.cn), [zhangshp413@163.com](mailto:zhangshp413@163.com).

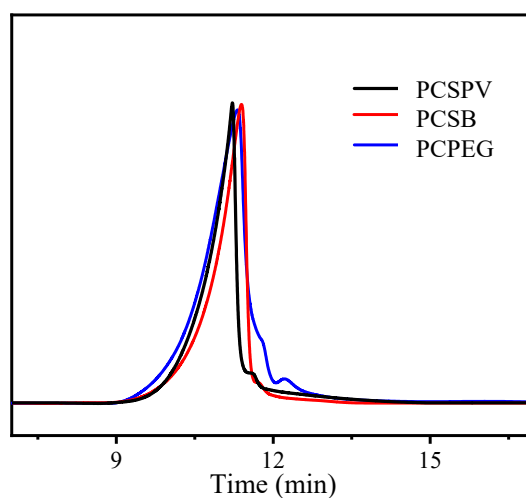

**Figure 1** GPC traces of the PCSPV, PCSB and PCPEG copolymers prepared from free radical copolymerization of MSA and SPV or SBMA or PEGMA, respectively.

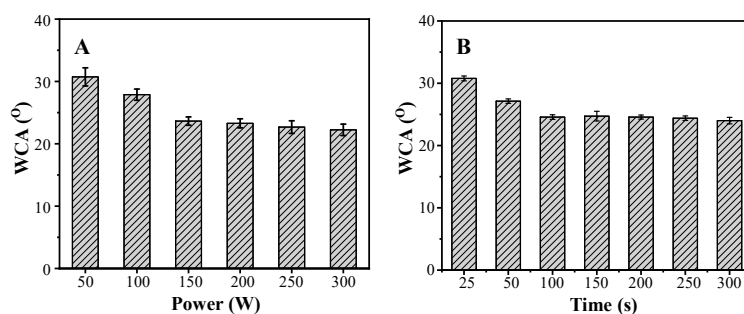

**Figure 2** Influences of power (A) and time (B) on WCA of PU surface treated by plasma.

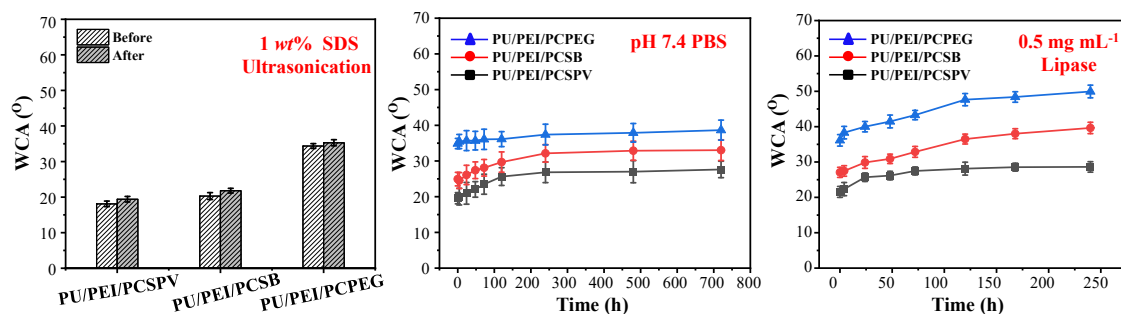

**Figure 3** Stability results of modified coatings in 1 wt% SDS with ultrasonication for 10 min, PBS (pH=7.4) buffer for 720 h, and in 0.5 mg mL<sup>-1</sup> lipase CALB solution for 240 h. Data represent mean ± SD (n = 3).

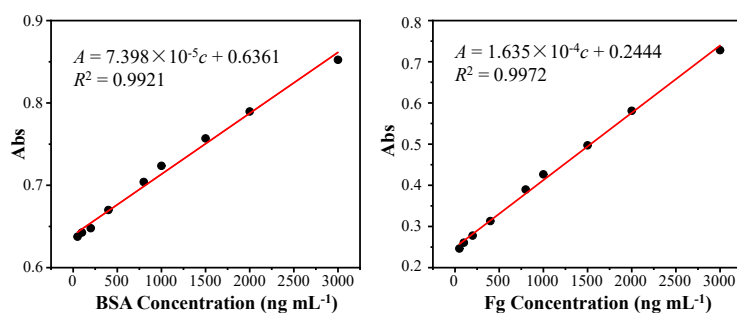

**Figure 4** The calibration curves of the BSA and Fg proteins.

$$\frac{m}{n} = \frac{2I_c}{I_{d,e,f,g}} \quad (1)$$

$$\frac{x}{y} = \frac{3I_c}{2I_o} \quad (2)$$

$$\frac{p}{q} = \frac{6I_c}{I_z} \quad (3)$$

Where  $I_c$  is the integral of methylene proton of MSA unit at 2.65 ppm,  $I_{d,e,f,g}$  is the integral of the protons on the heterocycle of SPV unit at 7.94~8.78 ppm,  $I_o$  is the integral of two methyl protons of SBMA unit at 3.10 ppm,  $I_z$  is the integral of methylene proton of PEGMA unit at 3.70 ppm, and  $m$ ,  $x$ , and  $p$  are repeat numbers of the MSA unit,  $n$ ,  $y$ , and  $q$  are the corresponding repeating number of SPV, SBMA, and PEGMA units in the three copolymers, respectively.
